# Supplementary figures and images for: Integration of Omics Data Sources to Inform Mechanistic Modeling of Immune‐Oncology Therapies: A Tutorial for Clinical Pharmacologists
Source: PubMed Central journal article supplement — Clin Pharmacol Ther. 2020 Feb 13;107(4):858–70. doi: 10.1002/cpt.1786 (PMC7158209; doi:10.1002/cpt.1786), 2020-02-13

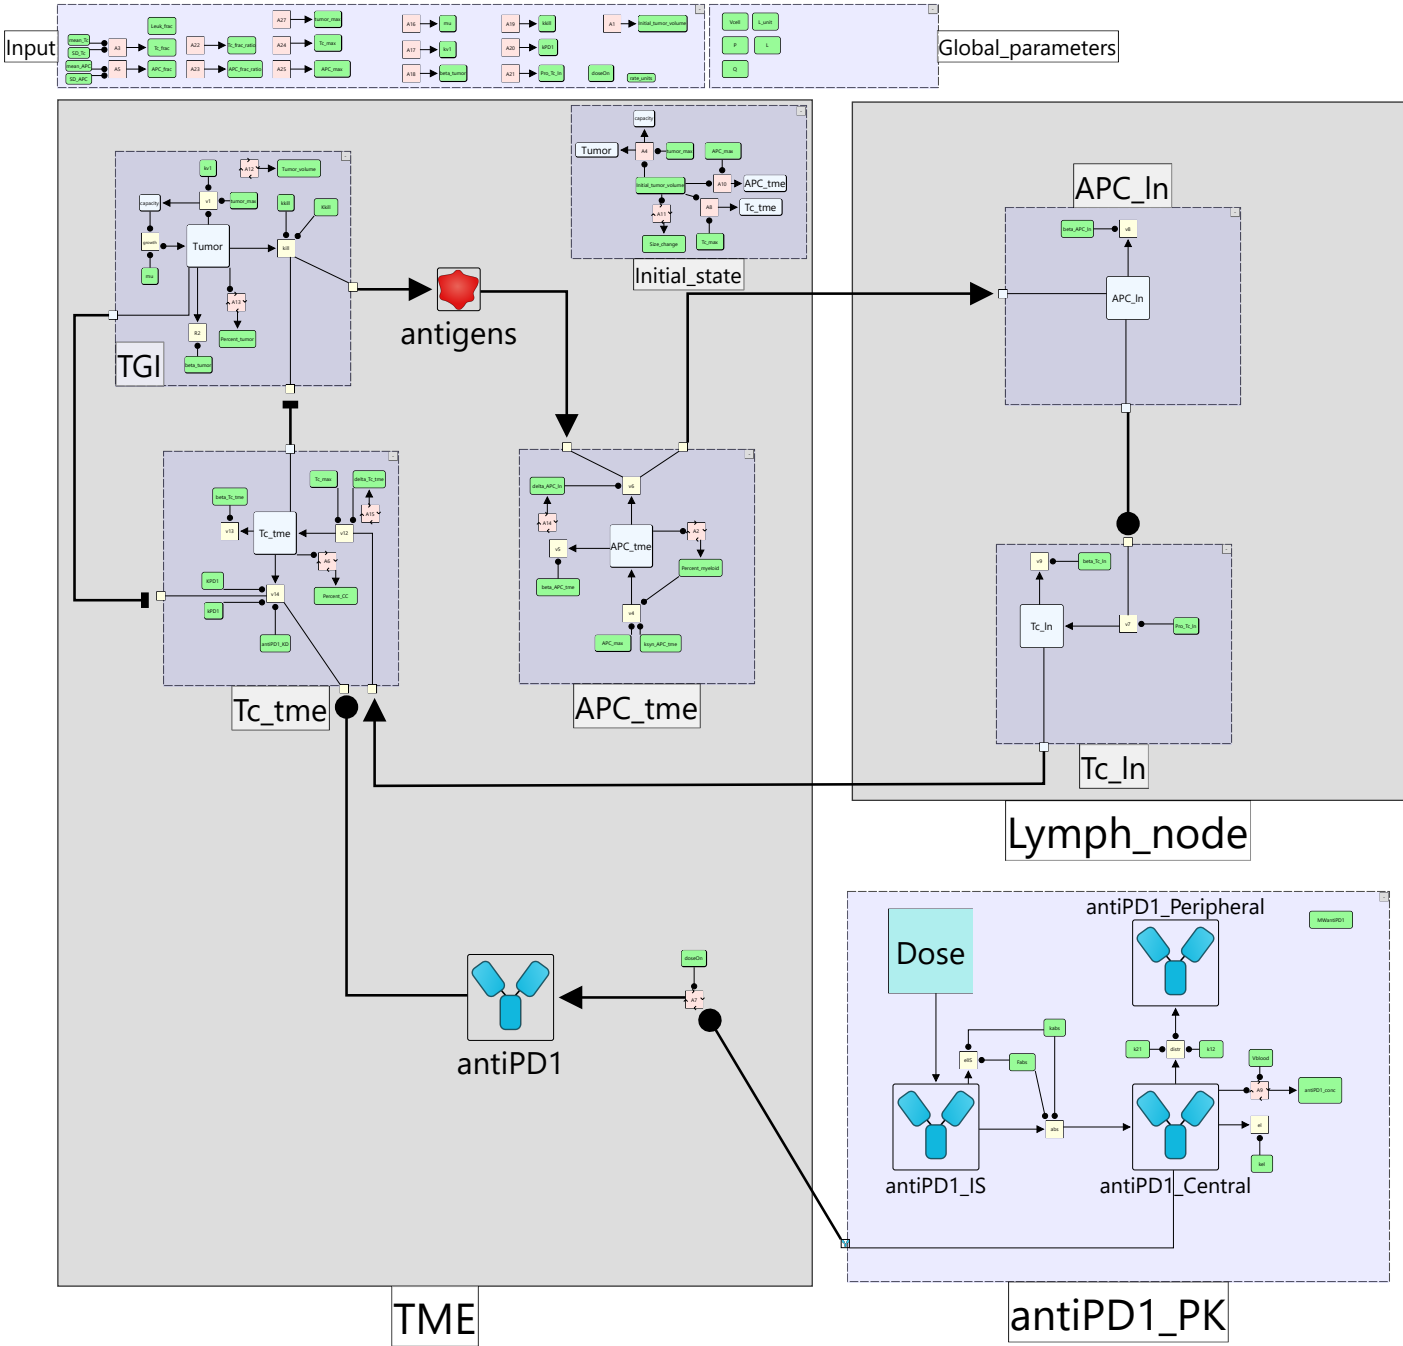

Supplement: CPT-107-858-s002.pdf [file CPT-107-858-s002.pdf]
